# Supplementary material
Source: ML conference proceedings conference paper supplement (https://proceedings.neurips.cc/paper_files/paper/2012/hash/af21d0c97db2e27e13572cbf59eb343d-Abstract.html)
Supplement: Supplementary file 1 [file af21d0c97db2e27e13572cbf59eb343d-Supplemental.zip]

---

# Supplementary Material

## Multimodal Learning with Deep Boltzmann Machines

---

**Nitish Srivastava**  
 Department of Computer Science  
 University of Toronto  
 nitish@cs.toronto.edu

**Ruslan Salakhutdinov**  
 Department of Statistics and Computer Science  
 University of Toronto  
 rsalakhu@cs.toronto.edu

### 1 Examples of Text Generated by the DBM model

These examples were generated by choosing upto 10 highest probability words under the conditional distribution over the text inputs given the images.

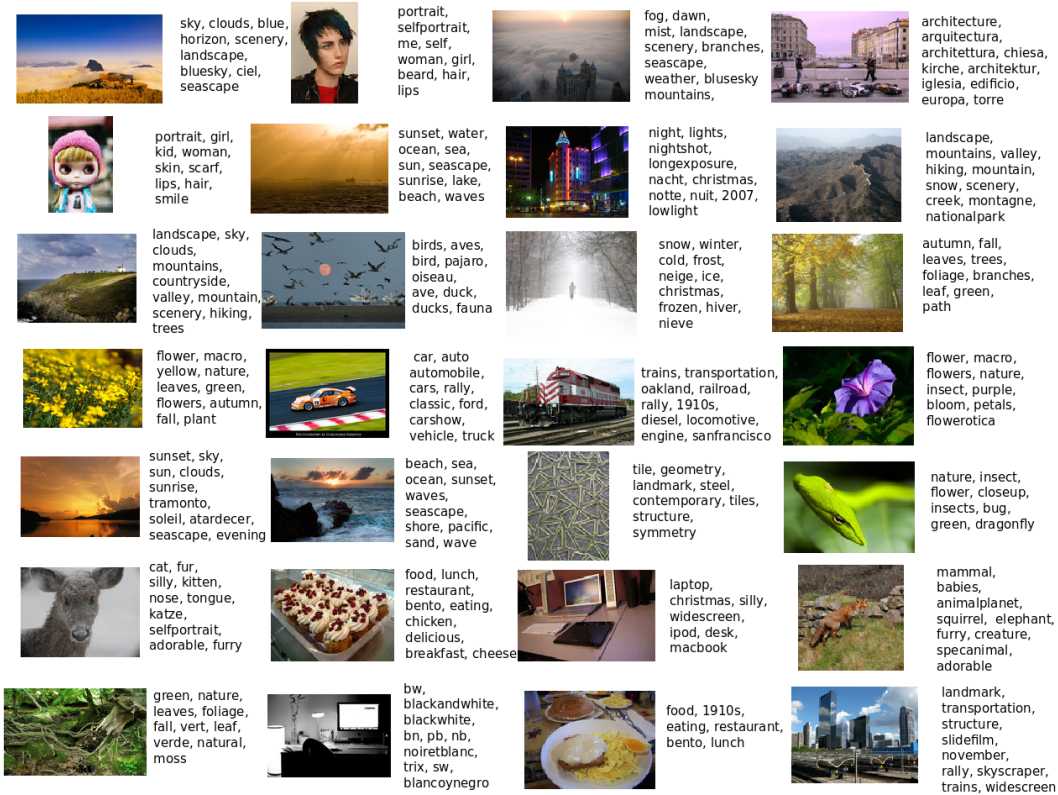

Figure 1: Examples of text generated from images by the DBM model

### 2 Topic-wise classification results

The classification task considered in this paper involves classifying inputs into topics. There are 38 topics and each input may belong to several topics. In order to make our results comparable

Table 1: Comparison of Average Precision scores of different models on the MIR Flickr Dataset with multimodal inputs.

| LABELS         | ANIMALS      | BABY         | BABY*        | BIRD         | BIRD*        | CAR          | CAR*         | CLOUDS       | CLOUDS*      | DOG          |
|----------------|--------------|--------------|--------------|--------------|--------------|--------------|--------------|--------------|--------------|--------------|
| RANDOM         | 0.129        | 0.010        | 0.005        | 0.030        | 0.019        | 0.047        | 0.015        | 0.148        | 0.054        | 0.027        |
| LDA            | 0.537        | <b>0.285</b> | <b>0.308</b> | 0.426        | 0.500        | 0.297        | 0.389        | 0.651        | 0.528        | 0.621        |
| SVM            | 0.531        | 0.200        | 0.165        | 0.443        | 0.520        | 0.339        | 0.434        | 0.695        | 0.434        | 0.607        |
| DBM-LABELLED   | 0.592        | 0.101        | 0.102        | 0.329        | 0.343        | 0.327        | 0.416        | 0.751        | 0.690        | 0.536        |
| DBM-UNLABELLED | 0.667        | 0.142        | 0.133        | 0.473        | 0.530        | 0.402        | 0.539        | 0.781        | 0.737        | 0.692        |
| DBN            | <b>0.688</b> | 0.158        | 0.150        | 0.516        | 0.586        | 0.417        | 0.570        | 0.789        | 0.748        | 0.697        |
| AUTOENCODER    | 0.687        | 0.162        | 0.151        | 0.521        | 0.594        | 0.419        | 0.576        | 0.789        | 0.749        | 0.696        |
| DBM            | 0.684        | 0.173        | 0.167        | <b>0.538</b> | <b>0.633</b> | <b>0.431</b> | <b>0.609</b> | <b>0.800</b> | <b>0.762</b> | <b>0.698</b> |
| LABELS         | DOG*         | FEMALE       | FEMALE*      | FLOWER       | FLOWER*      | FOOD         | INDOOR       | LAKE         | MALE         | MALE*        |
| RANDOM         | 0.024        | 0.247        | 0.159        | 0.073        | 0.043        | 0.040        | 0.333        | 0.032        | 0.243        | 0.146        |
| LDA            | 0.663        | 0.494        | 0.454        | 0.560        | 0.623        | 0.439        | 0.663        | 0.258        | 0.434        | 0.354        |
| SVM            | 0.641        | 0.465        | 0.451        | 0.480        | 0.717        | 0.308        | 0.683        | 0.207        | 0.413        | 0.335        |
| DBM-LABELLED   | 0.504        | 0.582        | 0.541        | 0.621        | 0.711        | 0.506        | 0.741        | 0.245        | 0.520        | 0.411        |
| DBM-UNLABELLED | 0.695        | 0.611        | 0.575        | 0.674        | 0.788        | 0.596        | 0.769        | 0.287        | 0.549        | 0.451        |
| DBN            | 0.705        | <b>0.619</b> | <b>0.584</b> | 0.683        | 0.802        | 0.623        | 0.776        | 0.298        | 0.558        | 0.465        |
| AUTOENCODER    | 0.706        | 0.619        | 0.583        | 0.684        | 0.802        | 0.630        | 0.775        | 0.300        | <b>0.559</b> | 0.467        |
| DBM            | <b>0.715</b> | 0.615        | 0.578        | <b>0.689</b> | <b>0.817</b> | <b>0.652</b> | <b>0.778</b> | <b>0.311</b> | 0.557        | <b>0.472</b> |
| LABELS         | NIGHT        | NIGHT*       | PEOPLE       | PEOPLE*      | PLANT_LIFE   | PORTRAIT     | PORTRAIT*    | RIVER        | RIVER*       | SEA          |
| RANDOM         | 0.108        | 0.027        | 0.415        | 0.314        | 0.351        | 0.157        | 0.153        | 0.036        | 0.006        | 0.053        |
| LDA            | 0.615        | 0.420        | 0.731        | 0.664        | 0.703        | 0.543        | 0.541        | 0.317        | <b>0.134</b> | 0.477        |
| SVM            | 0.588        | 0.450        | 0.748        | 0.565        | 0.691        | 0.480        | 0.558        | 0.158        | 0.109        | 0.529        |
| DBM-LABELLED   | 0.674        | 0.500        | 0.819        | 0.764        | 0.804        | 0.668        | 0.664        | 0.219        | 0.042        | 0.564        |
| DBM-UNLABELLED | 0.701        | 0.565        | 0.848        | 0.799        | 0.823        | 0.700        | 0.697        | 0.283        | 0.053        | 0.650        |
| DBN            | 0.705        | 0.577        | <b>0.854</b> | <b>0.807</b> | 0.829        | <b>0.708</b> | <b>0.706</b> | 0.303        | 0.057        | 0.659        |
| AUTOENCODER    | 0.704        | 0.577        | 0.853        | 0.806        | 0.828        | 0.707        | 0.705        | 0.304        | 0.057        | 0.661        |
| DBM            | <b>0.708</b> | <b>0.591</b> | 0.846        | 0.798        | <b>0.831</b> | 0.701        | 0.699        | <b>0.322</b> | 0.069        | <b>0.677</b> |
| LABELS         | SEA*         | SKY          | STRUCTURES   | SUNSET       | TRANSPORT    | TREE         | TREE*        | WATER        | MEAN         |              |
| RANDOM         | 0.009        | 0.316        | 0.400        | 0.085        | 0.116        | 0.187        | 0.027        | 0.133        | 0.124        |              |
| LDA            | 0.197        | 0.800        | 0.709        | 0.528        | 0.411        | 0.515        | 0.342        | 0.575        | 0.492        |              |
| SVM            | 0.201        | 0.823        | 0.695        | 0.613        | 0.369        | 0.559        | 0.321        | 0.527        | 0.475        |              |
| DBM-LABELLED   | 0.183        | 0.862        | 0.783        | 0.649        | 0.456        | 0.665        | 0.449        | 0.650        | 0.526        |              |
| DBM-UNLABELLED | 0.253        | 0.878        | 0.807        | 0.668        | 0.504        | 0.690        | 0.524        | 0.711        | 0.585        |              |
| DBN            | 0.266        | 0.883        | 0.813        | 0.674        | 0.521        | 0.700        | 0.536        | 0.724        | 0.599        |              |
| AUTOENCODER    | 0.271        | 0.883        | 0.812        | 0.675        | 0.523        | 0.701        | 0.539        | 0.725        | 0.600        |              |
| DBM            | <b>0.298</b> | <b>0.888</b> | <b>0.816</b> | <b>0.683</b> | <b>0.535</b> | <b>0.710</b> | <b>0.555</b> | <b>0.733</b> | <b>0.609</b> |              |

Table 2: Comparison of Average Precision scores of different models with unimodal inputs from the MIR Flickr Dataset.

| LABELS       | ANIMALS      | BABY         | BABY*        | BIRD         | BIRD*        | CAR          | CAR*         | CLOUDS       | CLOUDS*      | DOG          |
|--------------|--------------|--------------|--------------|--------------|--------------|--------------|--------------|--------------|--------------|--------------|
| IMAGE-SVM    | 0.278        | 0.084        | 0.088        | 0.128        | 0.129        | 0.179        | 0.227        | 0.651        | 0.511        | 0.155        |
| IMAGE-DBN    | 0.500        | 0.063        | 0.057        | 0.184        | 0.175        | 0.261        | 0.342        | 0.710        | 0.640        | 0.386        |
| IMAGE-DBM    | 0.513        | 0.065        | 0.063        | 0.203        | 0.196        | 0.266        | 0.349        | 0.713        | 0.644        | 0.401        |
| DBM-ZeroText | 0.587        | 0.100        | 0.100        | 0.319        | 0.333        | 0.322        | 0.409        | 0.749        | 0.687        | 0.523        |
| DBM-GenText  | <b>0.599</b> | <b>0.105</b> | <b>0.101</b> | <b>0.343</b> | <b>0.362</b> | <b>0.333</b> | <b>0.428</b> | <b>0.753</b> | <b>0.694</b> | <b>0.556</b> |
| LABELS       | DOG*         | FEMALE       | FEMALE*      | FLOWER       | FLOWER*      | FOOD         | INDOOR       | LAKE         | MALE         | MALE*        |
| IMAGE-SVM    | 0.156        | 0.461        | 0.389        | 0.469        | 0.519        | 0.293        | 0.605        | 0.188        | 0.407        | 0.294        |
| IMAGE-DBN    | 0.350        | 0.548        | 0.499        | 0.539        | 0.608        | 0.442        | 0.702        | 0.203        | 0.487        | 0.373        |
| IMAGE-DBM    | 0.367        | 0.550        | 0.502        | 0.551        | 0.624        | 0.449        | 0.705        | 0.204        | 0.488        | 0.374        |
| DBM-ZeroText | 0.491        | 0.581        | 0.539        | 0.617        | 0.705        | 0.502        | 0.739        | 0.242        | 0.518        | 0.409        |
| DBM-GenText  | <b>0.526</b> | <b>0.583</b> | <b>0.543</b> | <b>0.626</b> | <b>0.721</b> | <b>0.511</b> | <b>0.742</b> | <b>0.248</b> | <b>0.521</b> | <b>0.413</b> |
| LABELS       | NIGHT        | NIGHT*       | PEOPLE       | PEOPLE*      | PLANT_LIFE   | PORTRAIT     | PORTRAIT*    | RIVER        | RIVER*       | SEA          |
| IMAGE-SVM    | 0.554        | 0.390        | 0.631        | 0.558        | 0.687        | 0.493        | 0.493        | 0.179        | <b>0.102</b> | 0.366        |
| IMAGE-DBN    | 0.629        | 0.427        | 0.784        | 0.721        | 0.777        | 0.619        | 0.613        | 0.168        | 0.033        | 0.490        |
| IMAGE-DBM    | 0.632        | 0.432        | 0.786        | 0.724        | 0.777        | 0.624        | 0.619        | 0.170        | 0.030        | 0.496        |
| DBM-ZeroText | 0.672        | 0.495        | 0.817        | 0.762        | 0.803        | 0.666        | 0.662        | 0.215        | 0.042        | 0.558        |
| DBM-GenText  | <b>0.676</b> | <b>0.508</b> | <b>0.820</b> | <b>0.766</b> | <b>0.804</b> | <b>0.670</b> | <b>0.667</b> | <b>0.224</b> | 0.041        | <b>0.573</b> |
| LABELS       | SEA*         | SKY          | STRUCTURES   | SUNSET       | TRANSPORT    | TREE         | TREE*        | WATER        | MEAN         |              |
| IMAGE-SVM    | 0.126        | 0.775        | 0.626        | 0.588        | 0.298        | 0.514        | 0.205        | 0.448        | 0.375        |              |
| IMAGE-DBN    | 0.141        | 0.835        | 0.748        | 0.595        | 0.406        | 0.629        | 0.325        | 0.569        | 0.463        |              |
| IMAGE-DBM    | 0.145        | 0.835        | 0.750        | 0.602        | 0.411        | 0.632        | 0.342        | 0.579        | 0.469        |              |
| DBM-ZeroText | 0.180        | 0.861        | 0.781        | 0.647        | 0.454        | 0.663        | 0.441        | 0.645        | 0.522        |              |
| DBM-GenText  | <b>0.189</b> | <b>0.862</b> | <b>0.784</b> | <b>0.650</b> | <b>0.460</b> | <b>0.666</b> | <b>0.459</b> | <b>0.656</b> | <b>0.531</b> |              |

to previous results, we do one-vs-all classification for each topic separately. For a more detailed analysis of the results, Table 1 reports class-wise average precision scores for the models described in the paper with multimodal inputs.

Table 2 reports class-wise average precision scores for the models with unimodal inputs.
